# Supplementary material for: PdPt bimetallic nanowires with efficient oxidase mimic activity for the colorimetric detection of acid phosphatase in acidic media
Source: Royal Society of Chemistry journal article supplement (doi:10.1039/c9tb00730j), 2019-01-01
Supplement: c9tb00730j1.pdf [file c9tb00730j1.pdf]

# Supporting Information

## PdPt bimetallic nanowires with efficient oxidase mimics activity for colorimetric detection of acid phosphatase in acidic medium

LihuaJin\*, Yanan Sun, Lulu Shi, Cong Li and Yehua Shen

Key Laboratory of Synthetic and Natural Functional Molecule Chemistry of the Ministry of Education, College of Chemistry & Materials Science, Northwest University, Xi'an 710069, People's Republic of China

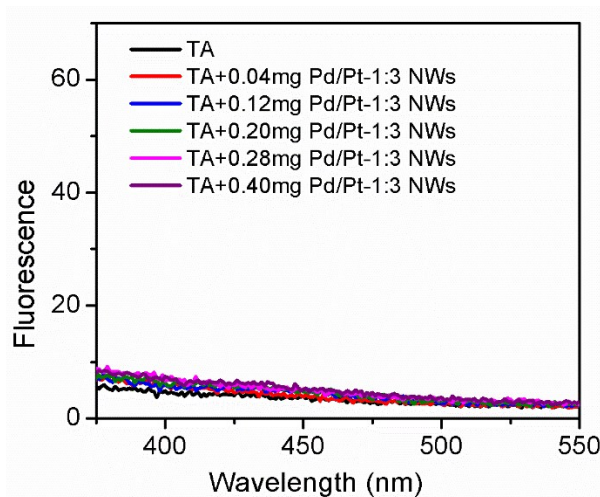

**Fig. S1** The fluorescence intensity of solution with 0.625 mM terephthalic acid and different concentration of Pd/Pt-1:3 NWs in HAc-NaAc buffer (0.2 M, pH 4.0) at 30 °C for 8 h.

\* To whom correspondence should be addressed. Fax: +86-029-88302635. E-mail: [jinlihua@nwu.edu.cn](mailto:jinlihua@nwu.edu.cn).

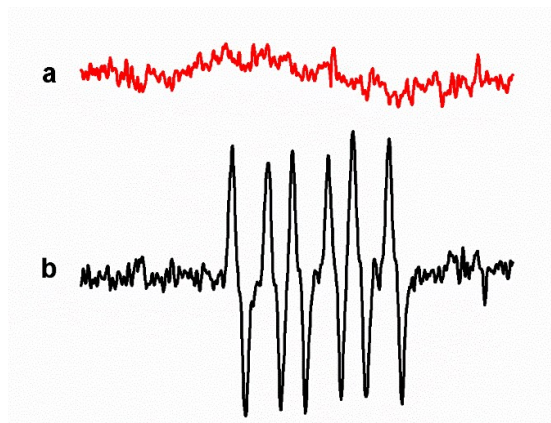

**Fig. S2** ESR spectra of (a) 100 mM DMPO in methanol, (b) Pd/Pt-1:3 NWs + 100 mM DMPO in methanol.

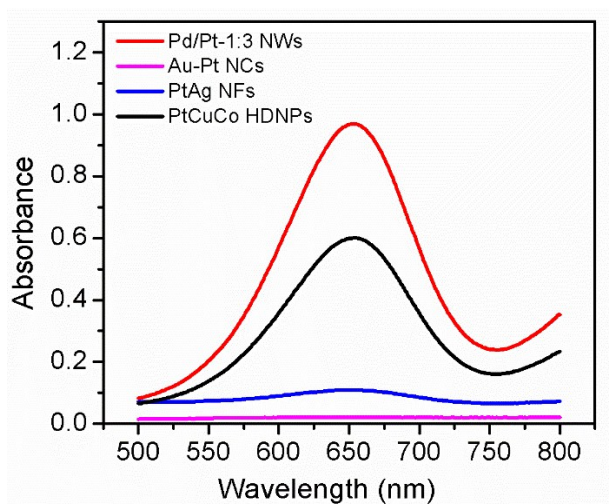

**Fig. S3** Absorbance corresponding to different nanomaterial at the same mass concentration.

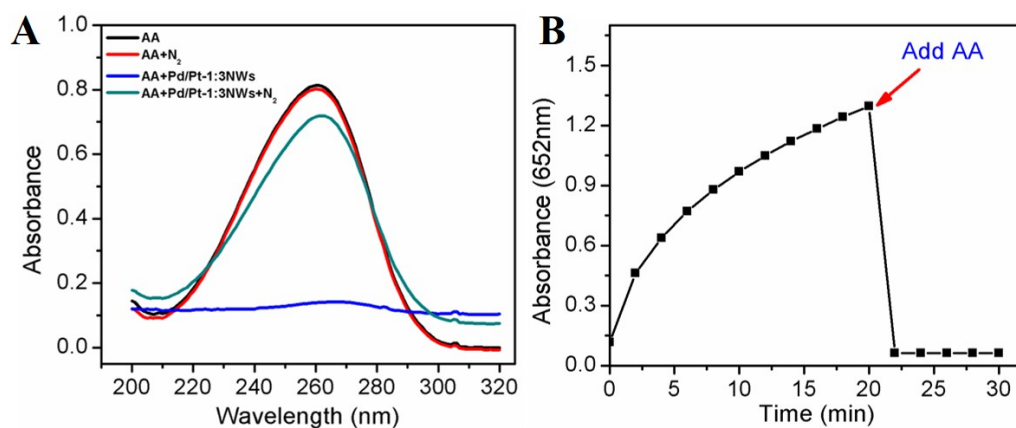

**Fig. S4** (A) The absorption spectra of AA in the absent or present of Pd/Pt-1:3 NWs in control and saturated N<sub>2</sub> solution. (B) The absorbance change of the Pd/Pt-1:3 NWs -mediated TMB oxidized chromogenic reaction after the addition of AA.

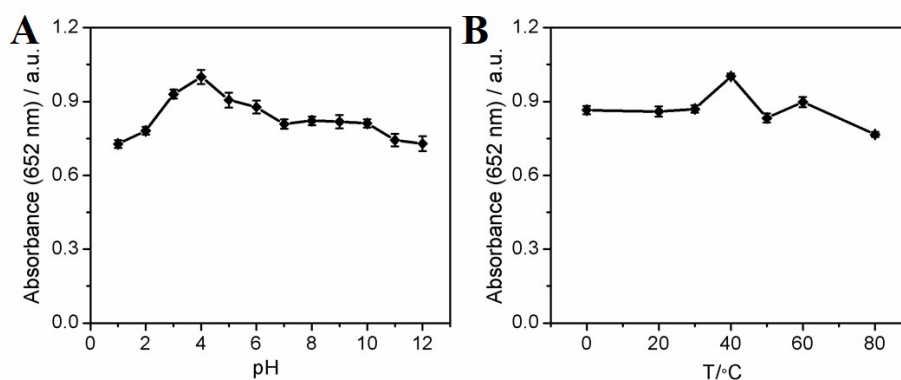

**Fig. S5** The catalytic activity of Pd/Pt-1:3 NWs after incubated in pH 1-12 solution for 2 h **(A)** and 0 – 80 °C solution for 2 h **(B)**, and then their catalytic activities were measured under standard conditions;

**Table S1.** Comparison of Michaelis-Menten constants ( $K_m$ ) and maximum reaction rates ( $V_m$ ) of the oxidation reaction catalyzed by Pd/Pt1:3NWs and reported other nanomaterial-based oxidase mimics.

| Catalyst                                         | Substrate | $K_m$ (mM) | $V_m$ ( $10^{-8}M \cdot s^{-1}$ ) | Reference |
|--------------------------------------------------|-----------|------------|-----------------------------------|-----------|
| Nanoceria                                        |           | 0.42       | 10.04                             | [1]       |
| Cit-AgNPs                                        |           | 0.23       | 38                                | [2]       |
| Lysozyme-Pt NCs                                  |           | 0.63       | 270                               | [3]       |
| MSN-AuNPs <sup>a</sup>                           |           | 0.22       | 11.87                             | [4]       |
| MOF(Co/2Fe)                                      |           | 0.199      | 0.39                              | [5]       |
| Fluorescein                                      | TMB       | 0.158      | 6.72                              | [6]       |
| CNFs/MnCo <sub>2</sub> O <sub>4.5</sub>          |           | 0.04       | 6.45                              | [7]       |
| NiCo <sub>2</sub> O <sub>4</sub> MS <sup>b</sup> |           | 0.127      | 0.999                             | [8]       |
| Pd/Pt-1:3 NWs                                    |           | 0.058      | 11.40                             | This work |

<sup>a</sup>mesoporous silica; <sup>b</sup>mesoporous spheres

**Table S2** Comparison of different methods for the determination of ACP.

| Materials                                          | Methods                         | Linear range  | Detection limit | Reference |
|----------------------------------------------------|---------------------------------|---------------|-----------------|-----------|
| AuNCs@GSH/MUA <sup>a</sup>                         | Fluorometry                     | 1-30 nM       | 1 nM            | [9]       |
| MPA <sup>b</sup> -CuInS <sub>2</sub> QDs           | Fluorometry                     | 6.4-192 nU/mL | 3.1 nU/mL       | [10]      |
| PPE4+/pNPP                                         | Fluorometry                     | 0-20 nM       | 0.17 nM         | [11]      |
| L-Cys-CuInS <sub>2</sub> QDs                       | Fluorometry                     | 75-1500 nU/mL | 9.02 nU/mL      | [12]      |
| P1 <sup>c</sup> -Fe <sup>3+</sup>                  | Fluorometry                     | 0-20 nM       | 0.18 nM         | [13]      |
| N-CDs-MnO <sub>2</sub>                             | Fluorometry                     | 5-40 U/L      | 0.1 U/L         | [14]      |
| GQDs@GSH-MnO <sub>2</sub>                          | Fluorometry                     | 0.1-9 U/L     | 0.027 U/L       | [15]      |
| SQ <sup>d</sup> -(NaPO <sub>3</sub> ) <sub>6</sub> | Colorimetric and<br>Fluorometry | 0-553 nM      | 4.9 nM          | [16]      |
| Cu(BCDS <sup>e</sup> ) <sub>2</sub> <sup>2-</sup>  | Colorimetry                     | 0-220 U/L     | 3.16 U/L        | [17]      |
| Ch-PtNPs                                           | Colorimetry                     | 0.25-2.5 U/L  | 0.016 U/L       | [18]      |
| Pd/Pt NWs                                          | Colorimetry                     | 0.17-2.67 U/L | 0.06 U/L        | This work |

<sup>a</sup>11-mercaptoundecanoic acid; <sup>b</sup> mercaptopropionic acid; <sup>c</sup> Squaraine; <sup>d</sup> novel anionic water soluble polymer; <sup>e</sup> bathocuproinedisulfonate

## References

1. H. J. Cheng, S. C. Lin, F. Muhammad, Y. W. Lin and H. Wei, *ACS Sens.*, 2016, **1**, 1336-1343.
2. G. L. Wang, X. F. Xu, L. H. Cao, C. H. He, Z. J. Li and C. Zhang, *RSC Adv.*, 2013, **4**, 5867-5872.
3. C. J. Yu, T. H. Chen, J. Y. Jiang and W. L. Tseng, *Nanoscale*, 2014, **6**, 9618-9624.
4. Y. Tao, E. G. Ju, J. S. Ren and X. G. Qu, *Adv. Mater.*, 2015, **27**, 1097-1104.
5. H. G. Yang, R. T. Yang, P. Zhang, Y. M. Qin, T. Chen and F. G. Ye, *Microchimica Acta*, 2017, **184**, 4629-4635.
6. L. Liu, C. Q. Sun, J. Yang, Y. Shi, Y. J. Long and H. Z. Zheng, *Chem. - Eur. J.*, 2018, **24**, 6148-6154.
7. M. Gao, X. F. Lu, G. D. Nie, M. Q. Chi and C. Wang, *Nanotechnology*, 2017, **28**, 485708-485716.
8. L. Su, W. P. Dong, C. K. Wu, Y. J. Gong, Y. Zhang, L. Li, G. J. Mao and S. L. Feng, *Anal. Chim. Acta*, 2017, **951**, 124-132.
9. J. Sun, F. Yang and X. R. Yang, *Nanoscale*, 2015, **7**, 16372-16380.

10. Z. H. Lin, Z. P. Liu, H. Zhang and X. G. Su, *Analyst*, 2015, **140**, 1629-1636.
11. Y. H. Xie, Y. Tan, R. X. Liu, R. Zhao, C. Y. Tan and Y. Y. Jiang, *ACS Appl. Mater. Interfaces*, 2012, **4**, 3784-3787.
12. Z. P. Liu, Z. H. Lin, L. L. Liu and X. G. Su, *Anal. Chim. Acta*, 2015, **876**, 83-90.
13. A. K. Dwivedi and P. K. Iyer, *Anal. Methods*, 2013, **5**, 2374-2378.
14. Z. M. Zhu, X. Y. Lin, L. N. Wu, C. F. Zhao, Y. J. Zheng, A. L. Liu, L. Q. Lin and X. H. Lin, *Sens. Actuators, B: Chem.*, 2018, **274**, 609-615.
15. Z. Y. Qu, N. Li, W. D. Na and X. G. Su, *Talanta*, 2019, **192**, 61-68.
16. Y. Q. Xu, B. H. Li, L. L. Xiao, J. Ouyang, S. G. Sun and Y. Pang, *Chem. Commun.*, 2014, **50**, 8677-8680.
17. Q. Hu, B. J. Zhou, F. Li, J. M. Kong and X. J. Zhang, *Chem-Asian J.*, 2016, **11**, 3040-3045.
18. H. H. Deng, X. L. Lin, Y. H. Liu, K. L. Li, Q. Q. Zhuang, H. P. Peng, A. L. Liu, X. H. Xia and W. Chen, *Nanoscale*, 2017, **9**, 10292-10300.
